# Supplementary material for: Improved resistive switching characteristics of a multi-stacked HfO2/Al2O3/HfO2 RRAM structure for neuromorphic and synaptic applications: experimental and computational study
Source: Royal Society of Chemistry journal article supplement (doi:10.1039/d1ra08103a), 2022-01-01
Supplement: d1ra08103a1.pdf [file d1ra08103a1.pdf]

## Supporting Information

### **Improved Resistive Switching Characteristics of multi-stacked HfO<sub>2</sub>/Al<sub>2</sub>O<sub>3</sub>/HfO<sub>2</sub> RRAM structure for neuromorphic and synaptic applications: Experimental and Computational study**

Ejaz Ahmad Khera<sup>a</sup>, Chandreswar Mahata<sup>b</sup>, Muhammad Imran<sup>c</sup>, Niaz Ahmad Niaz<sup>d</sup>, Fayyaz Hussain<sup>d\*</sup>, R. M. Arif Khalil<sup>d\*</sup>, Umbreen Rasheed<sup>d</sup> and SungjunKim<sup>b</sup>

<sup>a</sup>Department of Physics Bahawalnagar Campus, The Islamia University of Bahawalpur, 63100 Pakistan

<sup>b</sup>Division of Electronics and Electrical Engineering, Dongguk University, Seoul 04620, South Korea

<sup>c</sup>Department of Physics, Govt. College University Faisalabad, 38000, Pakistan

<sup>d</sup>Materials Simulation Research Laboratory (MSRL), Department of Physics, Bahauddin Zakariya University Multan Pakistan, 60800

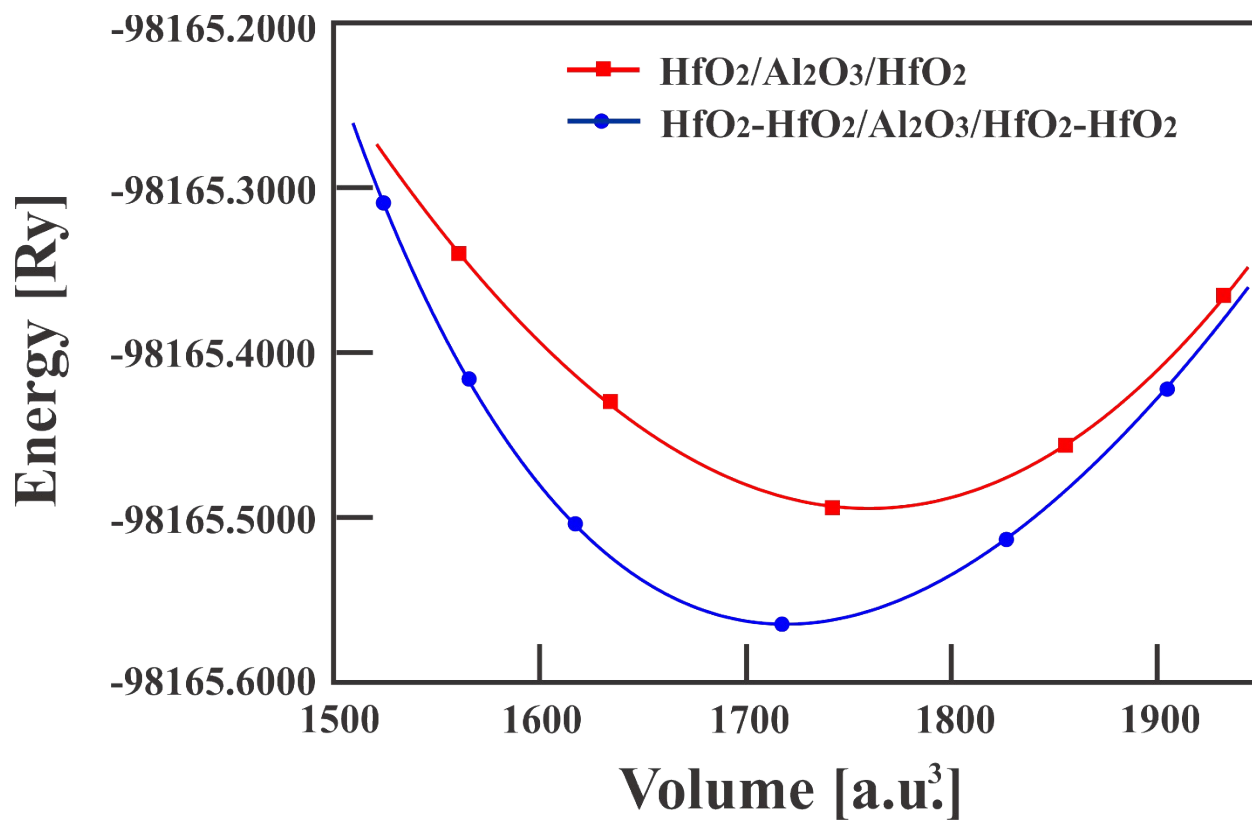

**Figure S1.** The geometry optimized Energy vs. Volume plots using Birch Murnaghan equation of states.

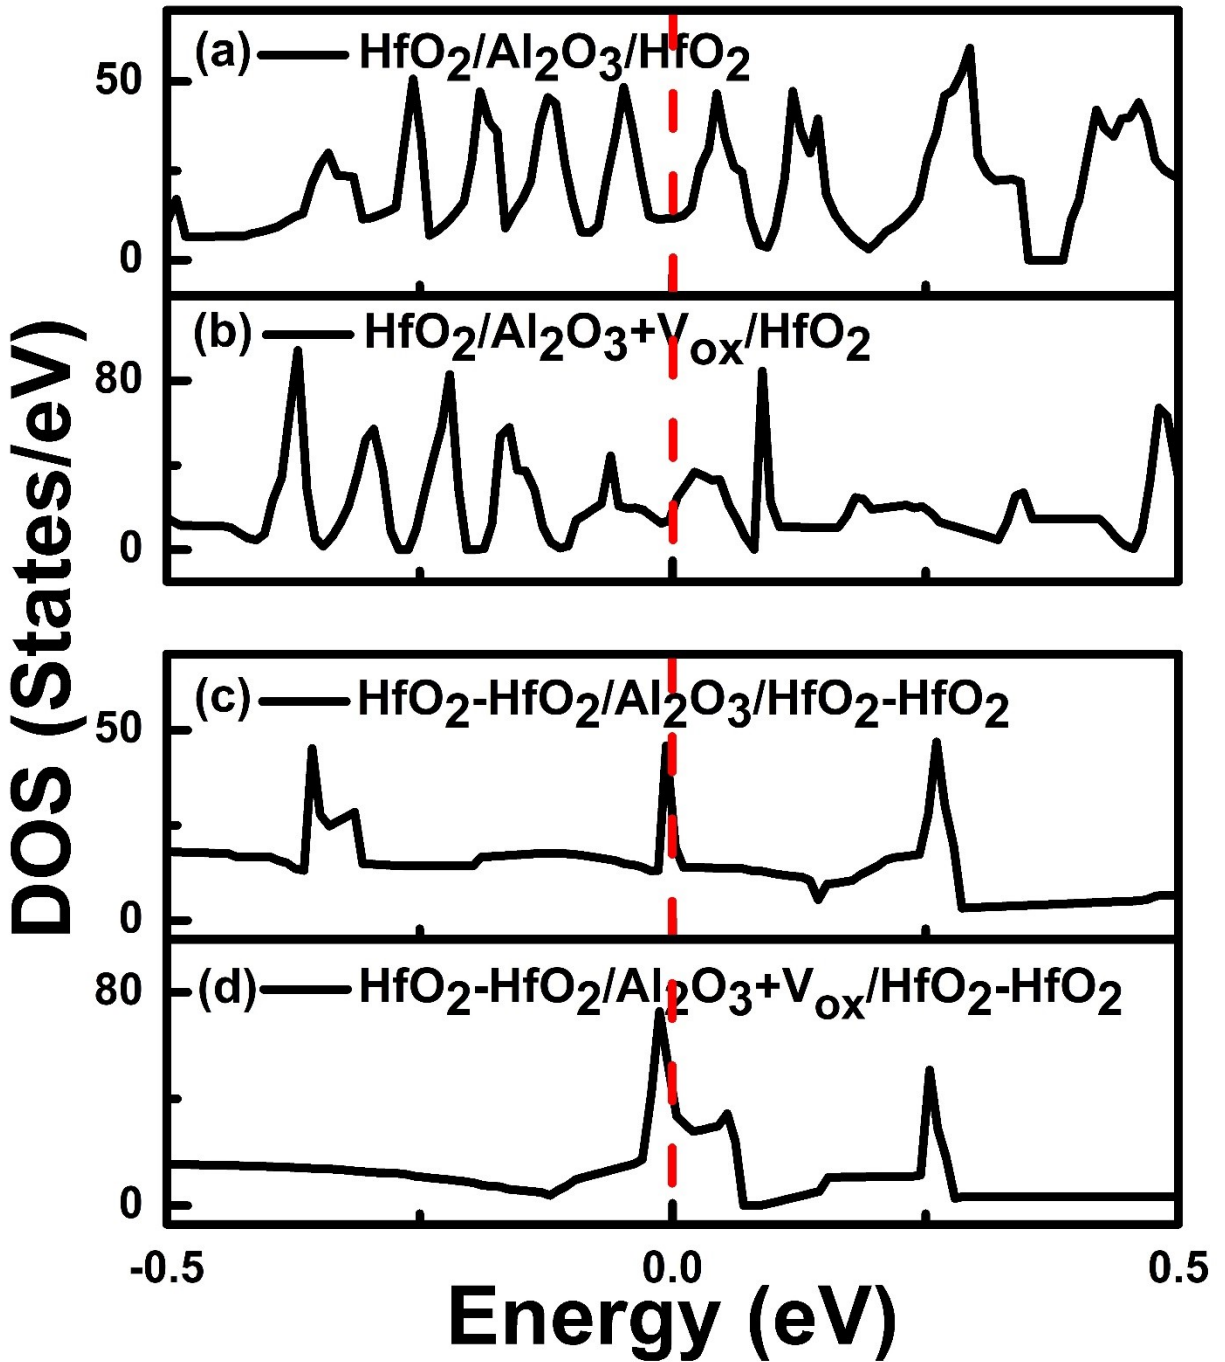

Figure S2. The calculated Density of States (DOS) using VASP simulation code.
